# Supplementary material for: Synthesis of heterocyclic (triazole, furoxan, furazan) fused pyridazine di-N-oxides via hypervalent iodine oxidation
Source: Royal Society of Chemistry journal article supplement (doi:10.1039/d2nj02908a), 2022-01-01

*Supporting Information for*

**Synthesis of Heterocyclic (Triazole, Furoxan, Furazan) Fused Pyridazine Di-N-Oxides via Hypervalent Iodine Oxidation**

Qi Zhang <sup>a,b</sup>, Chunlin He <sup>a,b,c,d, \*e</sup> and Siping Pang <sup>a,c\*</sup>

<sup>a</sup> School of Materials Science & Engineering, Beijing Institute of Technology, Beijing 100081, China;

<sup>b</sup> Experimental Center of Advanced Materials, Beijing Institute of Technology, Beijing 100081, China;

<sup>c</sup> State Key Laboratory of Explosion Science and Technology, Beijing Institute of Technology, Beijing 100081, China;

<sup>d</sup> Yangtze Delta Region Academy of Beijing Institute of Technology, Jiaxing 314019, China;

<sup>e</sup> Chongqing Innovation Center, Beijing Institute of Technology, Chongqing 401120, China;

E-mail: [chunlinhe@bit.edu.cn](mailto:chunlinhe@bit.edu.cn); [pangsp@bit.edu.cn](mailto:pangsp@bit.edu.cn).

**Contents**

|             |                                                                   |     |
|-------------|-------------------------------------------------------------------|-----|
| <b>I.</b>   | General information.....                                          | S2  |
| <b>II.</b>  | Experimental procedure.....                                       | S2  |
| <b>III.</b> | X-Ray crystallographic data.....                                  | S4  |
| <b>IV.</b>  | Characterization data for the products.....                       | S11 |
| <b>V.</b>   | Copies of <sup>1</sup> H-NMR and <sup>13</sup> C-NMR spectra..... | S13 |
| <b>VI.</b>  | IR spectra.....                                                   | S18 |

## I. General information

All reagents were purchased from commercial sources (Energy Chemical, Adamas-beta®, J&K Scientific, Sigma-Aldrich) and used without purification unless otherwise mentioned. The products were purified by column chromatography over silica gel (200-300 size).  $^1\text{H}$  and  $^{13}\text{C}$  Nuclear Magnetic Resonance (NMR) spectra were recorded at 25 °C on a Bruker 400 MHz, 100 MHz, and TMS was used as internal standard. Infrared spectra (IR) were obtained on a PerkinElmer Spectrum BX FT-IR instrument equipped with an ATR unit at 25 °C. Elemental analyses of C/H/N were investigated on a Vario EL III Analyzer. High resolution mass spectra (HRMS) were recorded on Thermo Scientific LTQ Orbitrap XL and Thermo Scientific Q Exactive by using ESI method. The onset decomposition temperature was recorded on TA Discovery DSC 25.

### Note of Caution:

Furoxan and azide compounds are explosive substance and may explode under certain conditions. Appropriate safety precautions should be taken when preparing and handling.

## II. Experimental procedure

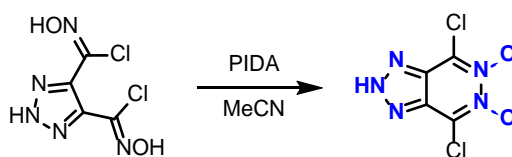

**General procedure for the synthesis of triazole-fused pyradizine di-N-dioxide:** In a Schlenk tube, a solution of 1,4-dioxime (2.0 mmol, 1.0 equiv), PIDA (2.4 mmol, 1.2 equiv) in acetonitrile (2 mL) was stirred for 1 h at 25 °C. Then white solid was filtered, washed with petroleum ether (5 mL) and air dried to give triazole-fused pyradizine di-N-dioxide.

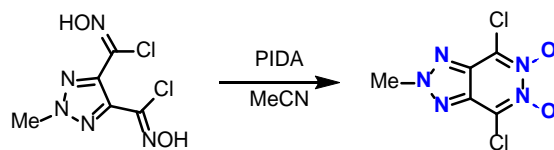

In a Schlenk tube, a solution of 1,4-dioxime (2.0 mmol, 1.0 equiv), PIDA (2.4 mmol, 1.2 equiv) in acetonitrile (2 mL) was stirred for 1 h at 25 °C. Then saturated aq NaHCO<sub>3</sub> solution is added and extracted with EA (3 × 10 mL). Combined organic layers was dried over Na<sub>2</sub>SO<sub>4</sub> and filtered, evacuated under vacuum. The residue was purified by silica gel column chromatography (petroleum ether/ethyl acetate = 4/1) to give triazole-fused pyradizine di-*N*-dioxide.

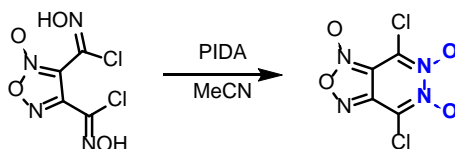

**General procedure for the synthesis of furoxan-fused pyradizine di-*N*-dioxide:** In a Schlenk tube, a solution of 1,4-dioxime (0.5 mmol, 1.0 equiv), PIDA (0.6 mmol, 1.2 equiv) in acetonitrile (2 mL) was stirred for 30 min at 25 °C. Then saturated aq NaHCO<sub>3</sub> solution is added and extracted with EA (3 × 10 mL). Combined organic layers was dried over Na<sub>2</sub>SO<sub>4</sub> and filtered, evacuated under vacuum. The residue was purified by silica gel column chromatography (petroleum ether/ethyl acetate = 10/1) to give furoxan-fused pyradizine di-*N*-dioxide.

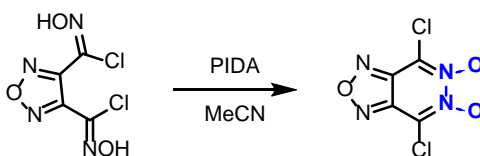

**General procedure for the synthesis of furazan-fused pyradizine di-*N*-dioxide:** In a Schlenk tube, a solution of 1,4-dioxime (0.5 mmol, 1.0 equiv), PIDA (0.6 mmol, 1.2 equiv) in acetonitrile (2 mL) was stirred for 30 min at 25 °C. Then saturated aq NaHCO<sub>3</sub> solution is added and extracted with EA (3 × 10 mL). Combined organic layers was dried over Na<sub>2</sub>SO<sub>4</sub> and filtered, evacuated under vacuum. The residue was purified by silica gel column chromatography (petroleum ether/ethyl acetate = 10/1) to give furazan-fused pyradizine di-*N*-dioxide.

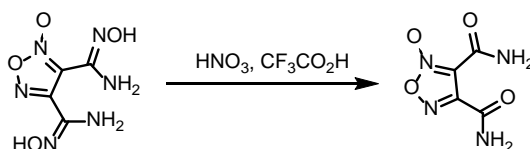

**General procedure for the synthesis of 3,4-dicarbamoyl-1,2,5-oxadiazole 2-oxide:** In a Schlenk tube, 1,4-dioxime (1.0 mmol, 1.0 equiv) was added at -20 °C to a mixture of HNO<sub>3</sub> (d = 1.495 g/cm<sup>3</sup>,

1.0 mL, 23.7 mmol) and  $\text{CF}_3\text{CO}_2\text{H}$  ( $d = 1.489 \text{ g/cm}^3$ , 2.0 mL, 26.1 mmol). The reaction mixture was stirred for 10 min at this temperature, poured into crushed ice (10 g). The precipitate was filtered, washed with water and dried.

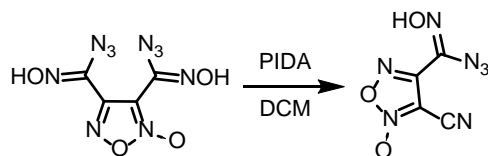

**General procedure for the synthesis of 4-(azido(hydroxyimino)methyl)-3-cyano-1,2,5-oxadiazole 2-oxide:** To a solution of 1,4-dioxime (0.5 mmol, 1.0 equiv) in DCM (5 mL), PIDA (0.6 mmol, 1.2 equiv) was added in portion, then the mixture was stirred for 30 min at 25 °C. Saturated aq  $\text{NaHCO}_3$  solution is added and extracted with DCM ( $3 \times 10 \text{ mL}$ ). Combined organic layers was dried over  $\text{Na}_2\text{SO}_4$  and filtered, evacuated under vacuum. The residue was purified by silica gel column chromatography (petroleum ether/ethyl acetate = 10/1) to give 4-(azido(hydroxyimino)methyl)-3-cyano-1,2,5-oxadiazole 2-oxide.

### III. X-Ray crystallographic data

#### Crystal Structure of

#### 4,7-dichloro-2H-[1,2,3]triazolo[4,5-d]pyridazine 5,6-dioxide (4)

(CCDC No. 2175705)

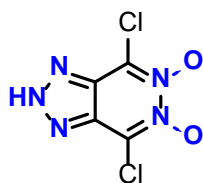

|                      |                                                                                                                                                 |
|----------------------|-------------------------------------------------------------------------------------------------------------------------------------------------|
| Empirical formula    | $\text{C}_4\text{HCl}_2\text{N}_5\text{O}_2$                                                                                                    |
| Temperature          | 170.0 K                                                                                                                                         |
| Wavelength           | 0.71073 Å                                                                                                                                       |
| Unit cell dimensions | $a = 13.829(3) \text{ Å}$<br>$b = 7.0389(13) \text{ Å}$<br>$c = 15.224(3) \text{ Å}$<br>$\alpha = 90 \text{ deg.}$<br>$\beta = 90 \text{ deg.}$ |

|                                                                                      |                              |
|--------------------------------------------------------------------------------------|------------------------------|
|                                                                                      | gamma = 90 deg.              |
| Volume                                                                               | 1482.0 (5) Å <sup>3</sup>    |
| Z                                                                                    | 8                            |
| Calculated density                                                                   | 1.990 g/cm <sup>3</sup>      |
| Absorption coefficient                                                               | 0.845 mm <sup>-1</sup>       |
| F(000)                                                                               | 880.0                        |
| Crystal size                                                                         | 0.12 x 0.08 x 0.05 mm        |
| Θ range for data collection                                                          | 2.676 to 26.376 deg.         |
| Reflections collected / unique                                                       | 4614 / 1485[R(int) = 0.0795] |
| Data / restraints / parameters                                                       | 1485 / 4 / 121               |
| Goodness-of-fit on F <sup>2</sup>                                                    | 1.048                        |
| Final R indices [I>2sigma(I)]                                                        | R1 = 0.0622, wR2 = 0.1485    |
| Rindices (all data)                                                                  | R1 = 0.1028, wR2 = 0.1733    |
| 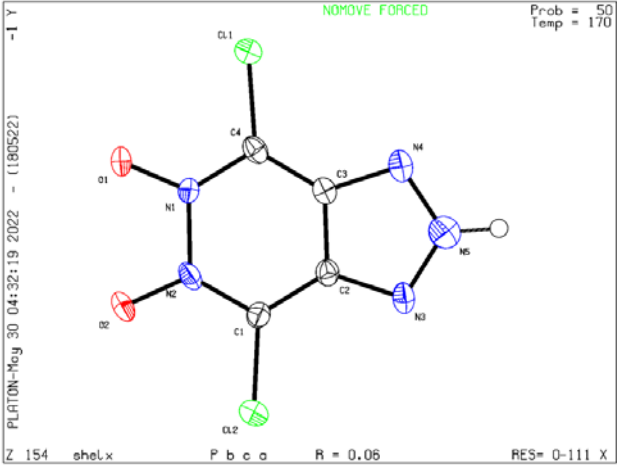 |                              |
| Growth in DMF/DCM at room temperature                                                |                              |

**Crystal Structure of**  
**4,7-dichloro-[1,2,5]oxadiazolo[3,4-d]pyridazine 1,5,6-trioxide (8)**  
 (CCDC No. 2175700)

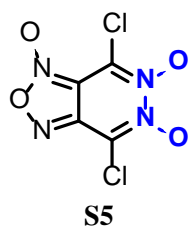

|                                                                                      |                                                                                                                         |
|--------------------------------------------------------------------------------------|-------------------------------------------------------------------------------------------------------------------------|
| Empirical formula                                                                    | C <sub>4</sub> Cl <sub>2</sub> N <sub>4</sub> O <sub>4</sub>                                                            |
| Temperature                                                                          | 150.0 K                                                                                                                 |
| Wavelength                                                                           | 0.71073 Å                                                                                                               |
| Unit cell dimensions                                                                 | a = 9.1210(7) Å<br>b = 5.9953(5) Å<br>c = 14.5570(12) Å<br>alpha = 90 deg.<br>beta = 100.853(3) deg.<br>gamma = 90 deg. |
| Volume                                                                               | 781.78 (11) Å <sup>3</sup>                                                                                              |
| Z                                                                                    | 4                                                                                                                       |
| Calculated density                                                                   | 2.030 g/cm <sup>3</sup>                                                                                                 |
| Absorption coefficient                                                               | 0.824 mm <sup>-1</sup>                                                                                                  |
| F(000)                                                                               | 472.0                                                                                                                   |
| Crystal size                                                                         | 0.13 x 0.06 x 0.03 mm                                                                                                   |
| 2 $\theta$ range for data collection                                                 | 4.89 to 52.816 deg.                                                                                                     |
| Reflections collected / unique                                                       | 8446 / 1604 [R(int) = 0.0412]                                                                                           |
| Data / restraints / parameters                                                       | 1604 / 1 / 127                                                                                                          |
| Goodness-of-fit on F <sup>2</sup>                                                    | 1.076                                                                                                                   |
| Final R indices [I > 2sigma(I)]                                                      | R1 = 0.0312, wR2 = 0.0602                                                                                               |
| Rindices (all data)                                                                  | R1 = 0.0470, wR2 = 0.0681                                                                                               |
| 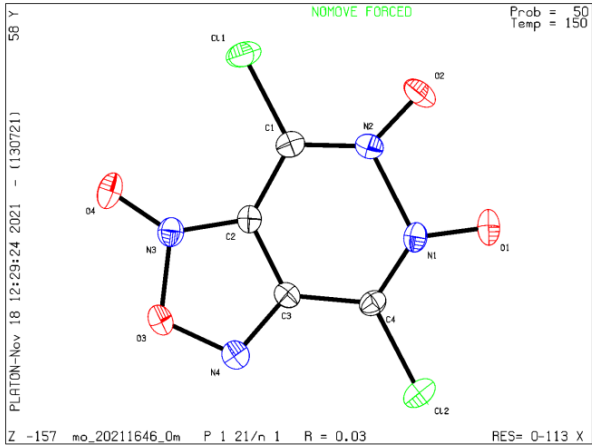 |                                                                                                                         |
| Growth in EA/PE at room temperature                                                  |                                                                                                                         |

**Crystal Structure of**  
**4,7-dichloro-[1,2,5]oxadiazolo[3,4-d]pyridazine 5,6-dioxide (12)**

(CCDC No. 2175701)

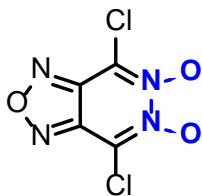

|                                   |                                                                                                                  |
|-----------------------------------|------------------------------------------------------------------------------------------------------------------|
| Empirical formula                 | C <sub>4</sub> Cl <sub>2</sub> N <sub>4</sub> O <sub>3</sub>                                                     |
| Temperature                       | 150.0 K                                                                                                          |
| Wavelength                        | 0.71073 Å                                                                                                        |
| Unit cell dimensions              | a = 8.9927(5) Å<br>b = 15.7743(9) Å<br>c = 21.8858(14) Å<br>alpha = 90 deg.<br>beta = 90 deg.<br>gamma = 90 deg. |
| Volume                            | 3104.6(3) Å <sup>3</sup>                                                                                         |
| Z                                 | 16                                                                                                               |
| Calculated density                | 1.908 g/cm <sup>3</sup>                                                                                          |
| Absorption coefficient            | 0.813 mm <sup>-1</sup>                                                                                           |
| F(000)                            | 1760.0                                                                                                           |
| Crystal size                      | 0.12 x 0.08 x 0.05 mm                                                                                            |
| 2θ range for data collection      | 5.49 to 52.862 deg.                                                                                              |
| Reflections collected / unique    | 26541 / 3177 [R(int) = 0.0511]                                                                                   |
| Data / restraints / parameters    | 3177 / 581 / 316                                                                                                 |
| Goodness-of-fit on F <sup>2</sup> | 1.026                                                                                                            |
| Final R indices [I > 2σ(I)]       | R1 = 0.0537, wR2 = 0.1241                                                                                        |
| Rindices (all data)               | R1 = 0.0728, wR2 = 0.1391                                                                                        |

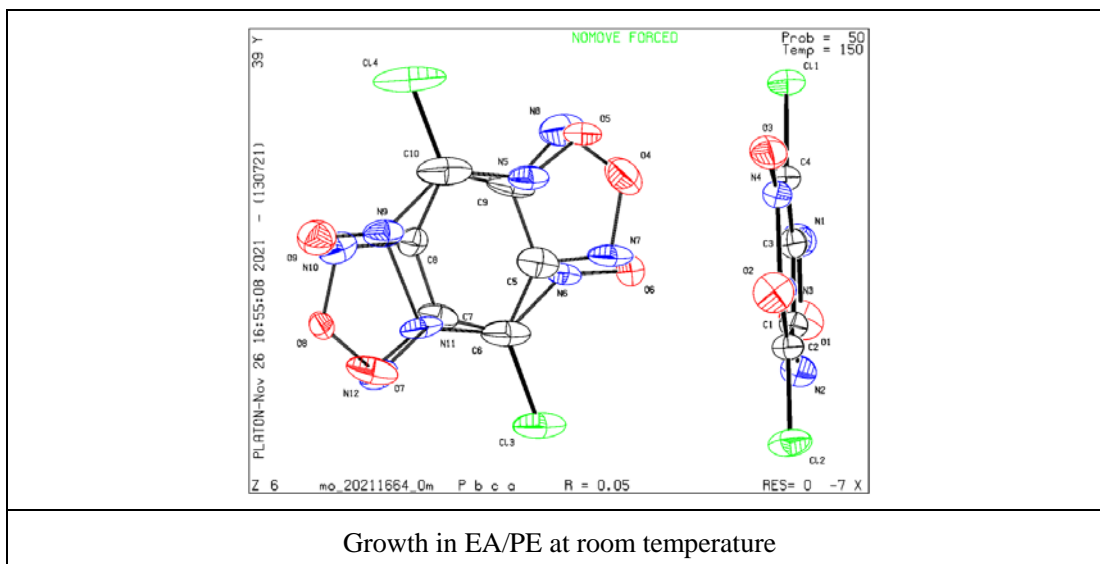

**Crystal Structure of**  
**3,4-dicarbamoyl-1,2,5-oxadiazole 2-oxide (14)**  
 (CCDC No. 2175706)

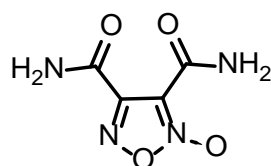

|                        |                                                                                                                                       |
|------------------------|---------------------------------------------------------------------------------------------------------------------------------------|
| Empirical formula      | C <sub>4</sub> H <sub>4</sub> N <sub>4</sub> O <sub>4</sub>                                                                           |
| Temperature            | 150.0 K                                                                                                                               |
| Wavelength             | 0.71073 Å                                                                                                                             |
| Unit cell dimensions   | a = 5.0887(16) Å<br>b = 7.8054(19) Å<br>c = 7.906(2) Å<br>alpha = 89.639(7) deg.<br>beta = 80.847(10) deg.<br>gamma = 89.131(10) deg. |
| Volume                 | 309.99(15) Å <sup>3</sup>                                                                                                             |
| Z                      | 2                                                                                                                                     |
| Calculated density     | 1.844 g/cm <sup>3</sup>                                                                                                               |
| Absorption coefficient | 0.166 mm <sup>-1</sup>                                                                                                                |



|                                                         |                               |
|---------------------------------------------------------|-------------------------------|
| F(000)                                                  | 176.0                         |
| Crystal size                                            | 0.12 x 0.05 x 0.03 mm         |
| 2 $\theta$ range for data collection                    | 5.218 to 52.696 deg.          |
| Reflections collected / unique                          | 3278 / 1239 [R(int) = 0.0373] |
| Data / restraints / parameters                          | 1239 / 7 / 134                |
| Goodness-of-fit on F <sup>2</sup>                       | 1.078                         |
| Final R indices [I>2sigma(I)]                           | R1 = 0.0508, wR2 = 0.1044     |
| Rindices (all data)                                     | R1 = 0.0753, wR2 = 0.1182     |
|                                                         |                               |
| Growth in DMF/Et <sub>2</sub> O/DCM at room temperature |                               |

### Crystal Structure of

### 4-(azido(hydroxyimino)methyl)-3-cyano-1,2,5-oxadiazole 2-oxide (16)

(CCDC No. 2175709)

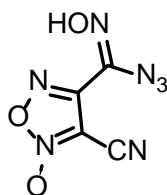

|                      |                                               |
|----------------------|-----------------------------------------------|
| Empirical formula    | C <sub>4</sub> HN <sub>7</sub> O <sub>3</sub> |
| Temperature          | 298.0 K                                       |
| Wavelength           | 0.71073 Å                                     |
| Unit cell dimensions | a = 9.3585(14) Å<br>b = 5.3944(9) Å           |

|                                                                                      |                                                                                                                             |
|--------------------------------------------------------------------------------------|-----------------------------------------------------------------------------------------------------------------------------|
|                                                                                      | $c = 15.367(2) \text{ \AA}$<br>$\alpha = 90 \text{ deg.}$<br>$\beta = 94.035(4) \text{ deg.}$<br>$\gamma = 90 \text{ deg.}$ |
| Volume                                                                               | $773.8(2) \text{ \AA}^3$                                                                                                    |
| Z                                                                                    | 4                                                                                                                           |
| Calculated density                                                                   | $1.675 \text{ g/cm}^3$                                                                                                      |
| Absorption coefficient                                                               | $0.145 \text{ mm}^{-1}$                                                                                                     |
| F(000)                                                                               | 392.0                                                                                                                       |
| Crystal size                                                                         | 0.12 x 0.08 x 0.05 mm                                                                                                       |
| 2 $\theta$ range for data collection                                                 | 4.946 to 52.874 deg.                                                                                                        |
| Reflections collected / unique                                                       | 5321 / 1582 [R(int) = 0.0449]                                                                                               |
| Data / restraints / parameters                                                       | 1582 / 1 / 131                                                                                                              |
| Goodness-of-fit on F <sup>2</sup>                                                    | 1.031                                                                                                                       |
| Final R indices [I > 2 $\sigma$ (I)]                                                 | R1 = 0.0584, wR2 = 0.1328                                                                                                   |
| Rindices (all data)                                                                  | R1 = 0.1176, wR2 = 0.1638                                                                                                   |
| 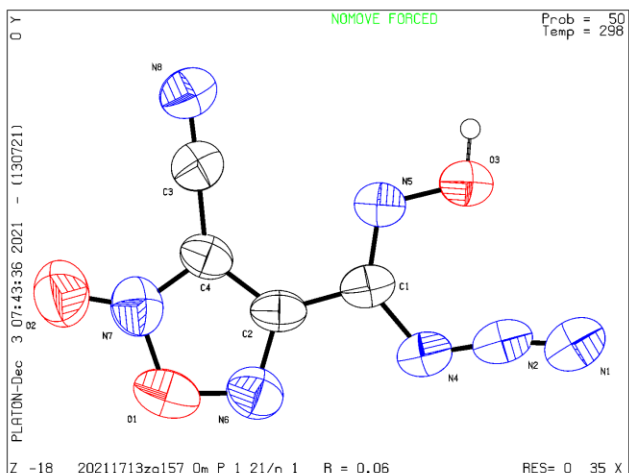 |                                                                                                                             |
| Growth in EA/PE at room temperature                                                  |                                                                                                                             |

#### IV. Characterization data for the products

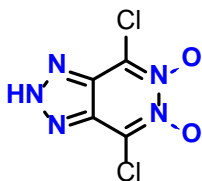

**4,7-Dichloro-2H-[1,2,3]triazolo[4,5-d]pyridazine 5,6-dioxide (4)** This compound was prepared according to the general procedure for the synthesis of triazole-fused pyridazine di-*N*-dioxide, yield 0.37 g (85%). White solid;  $T_{\text{dec}}$ : 190.7 °C;  $^1\text{H NMR}$  (400 MHz, DMSO)  $\delta$  16.48 (s, 1H).  $^{13}\text{C NMR}$  (100 MHz, DMSO)  $\delta$  131.8, 115.9. **IR** ( $\text{cm}^{-1}$ ) 2999, 2949, 1782, 1608, 1510, 1309, 1191, 1128, 977, 941, 907, 784, 693, 525. **Elemental analysis** (%) for  $\text{C}_4\text{HCl}_2\text{N}_5\text{O}_2$  (221.99): calcd: C 21.64, H 0.45, N 31.55. Found: C 21.17, H 0.64, N 31.76.

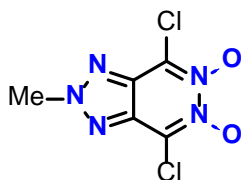

**4,7-Dichloro-2-methyl-2H-[1,2,3]triazolo[4,5-d]pyridazine 5,6-dioxide (4a)** This compound was prepared according to the general procedure for the synthesis of triazole-fused pyridazine di-*N*-dioxide, yield 0.37 g (78%). Yellow solid;  $T_{\text{dec}}$ : 170.2 °C;  $^1\text{H NMR}$  (400 MHz, DMSO)  $\delta$  4.49 (s, 3H).  $^{13}\text{C NMR}$  (100 MHz, DMSO)  $\delta$  133.7, 115.7, 44.2. **Elemental analysis** (%) for  $\text{C}_4\text{HCl}_2\text{N}_5\text{O}_2$  (236.01): calcd: C 25.45, H 1.28, N 29.67. Found: C 25.07, H 1.21, N 30.02.

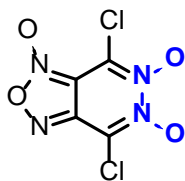

**4,7-Dichloro-[1,2,5]oxadiazolo[3,4-d]pyridazine 1,5,6-trioxide (8)** This compound was prepared according to the general procedure for the synthesis of furoxan-fused pyridazine di-*N*-dioxide. Purified on silica gel chromatography to give the product (89.6 mg, 75%) (petroleum ether/ethyl acetate = 10/1). Yellow solid;  $T_{\text{dec}}$ : 109.6 °C;  $^{13}\text{C NMR}$  (100 MHz,  $\text{CD}_3\text{CN}$ )  $\delta$  143.8, 110.0, 107.8, 105.8. **IR** ( $\text{cm}^{-1}$ ) 1605, 1504, 1396, 1255, 1185, 1078, 977, 910, 812, 747, 687, 473. **Elemental analysis** (%) for  $\text{C}_4\text{Cl}_2\text{N}_4\text{O}_4$  (238.97): calcd: C 20.10, N 23.45. Found: C 19.70, N 23.97.

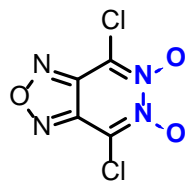

**4,7-Dichloro-[1,2,5]oxadiazolo[3,4-d]pyridazine 5,6-dioxide (12)** This compound was prepared according to the general procedure for the synthesis of furazan-fused pyridazine di-*N*-dioxide. Purified on silica gel chromatography to give the product (80.2 mg, 72%) (petroleum ether/ethyl acetate = 10/1). Yellow solid;  $T_{\text{dec}}$ : 135.8 °C;  $^{13}\text{C NMR}$  (100 MHz,  $\text{CD}_3\text{CN}$ )  $\delta$  143.1, 108.8. **IR** ( $\text{cm}^{-1}$ ) 1634, 1522, 1358, 1235, 985, 930, 877, 860, 743, 690, 589, 538, 433. **Elemental analysis** (%) for  $\text{C}_4\text{Cl}_2\text{N}_4\text{O}_3$  (222.97): calcd: C 21.55, N 25.13. Found: C 21.83, N 24.64.

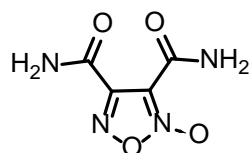

**3,4-Dicarbamoyl-1,2,5-oxadiazole 2-oxide (14)** Light yellow solid, 51.6 mg (31%);  $T_{\text{dec}}$ : 245.6°C;  $^1\text{H NMR}$  (400 MHz, DMSO)  $\delta$  8.71 (s, 1H), 8.42 (s, 1H), 8.35 (s, 1H), 8.30 (s, 1H).  $^{13}\text{C NMR}$  (100 MHz, DMSO)  $\delta$  158.4, 155.7, 152.0, 110.6. **HRMS** (ESI)  $m/z$  calcd for  $\text{C}_4\text{H}_4\text{N}_4\text{NaO}_4^+$  ( $\text{M}+\text{Na}$ ) $^+$  195.01248, found 195.01263.

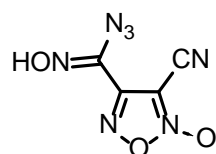

**4-(Azido(hydroxyimino)methyl)-3-cyano-1,2,5-oxadiazole 2-oxide (16)** White solid, 58.5 mg (60%);  $T_{\text{dec}}$ : 130.9 °C;  $^1\text{H NMR}$  (400 MHz, Acetone- $d_6$ )  $\delta$  12.22 (s, 1H).  $^{13}\text{C NMR}$  (100 MHz, Acetone- $d_6$ )  $\delta$  149.6, 134.9, 106.7, 96.9. **IR** ( $\text{cm}^{-1}$ ) 3323, 2161, 2112, 1621, 1603, 1475, 1405, 1337, 1262, 1037, 1015, 945, 863, 823, 694, 522, 441. **Elemental analysis** (%) for  $\text{C}_4\text{HN}_7\text{O}_3$  (195.10): calcd: C 24.63, H 0.52, N 50.26. Found: C 24.20, H 0.61, N 50.68.

## V. Figures of $^1\text{H}$ -NMR, $^{13}\text{C}$ -NMR spectra

$^1\text{H}$  NMR Spectrum of **4** (DMSO, 400 MHz)

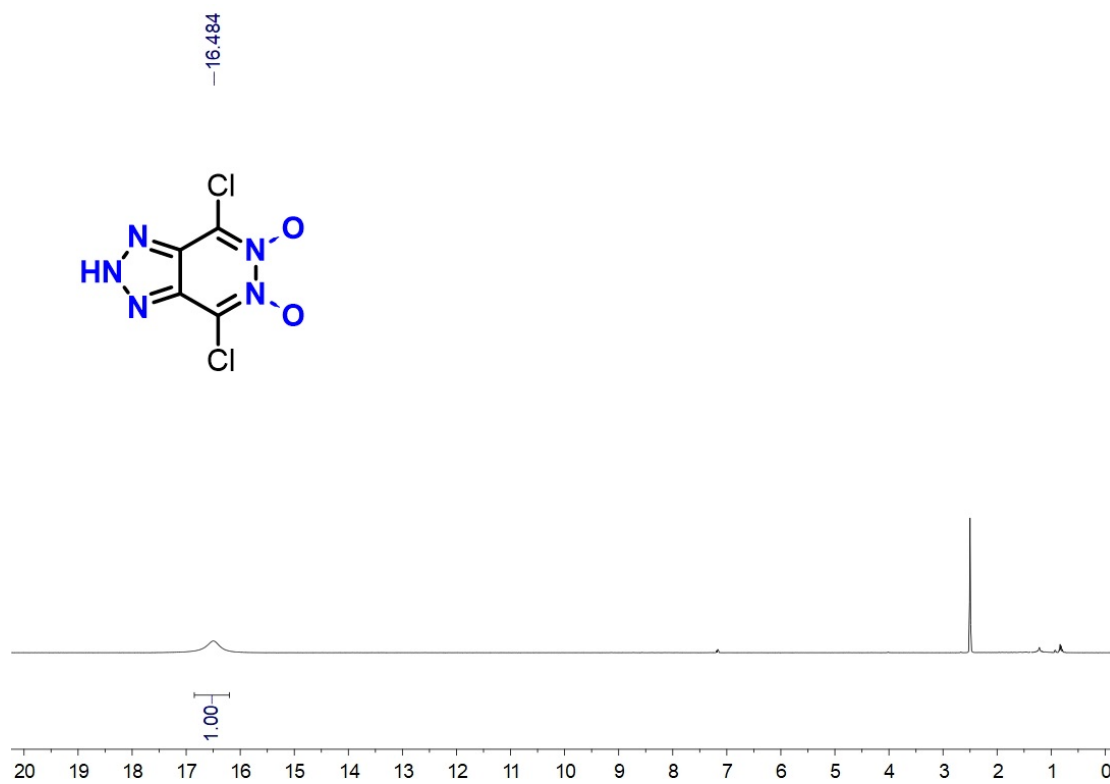

$^{13}\text{C}$  NMR Spectrum of **4** (DMSO, 100 MHz)

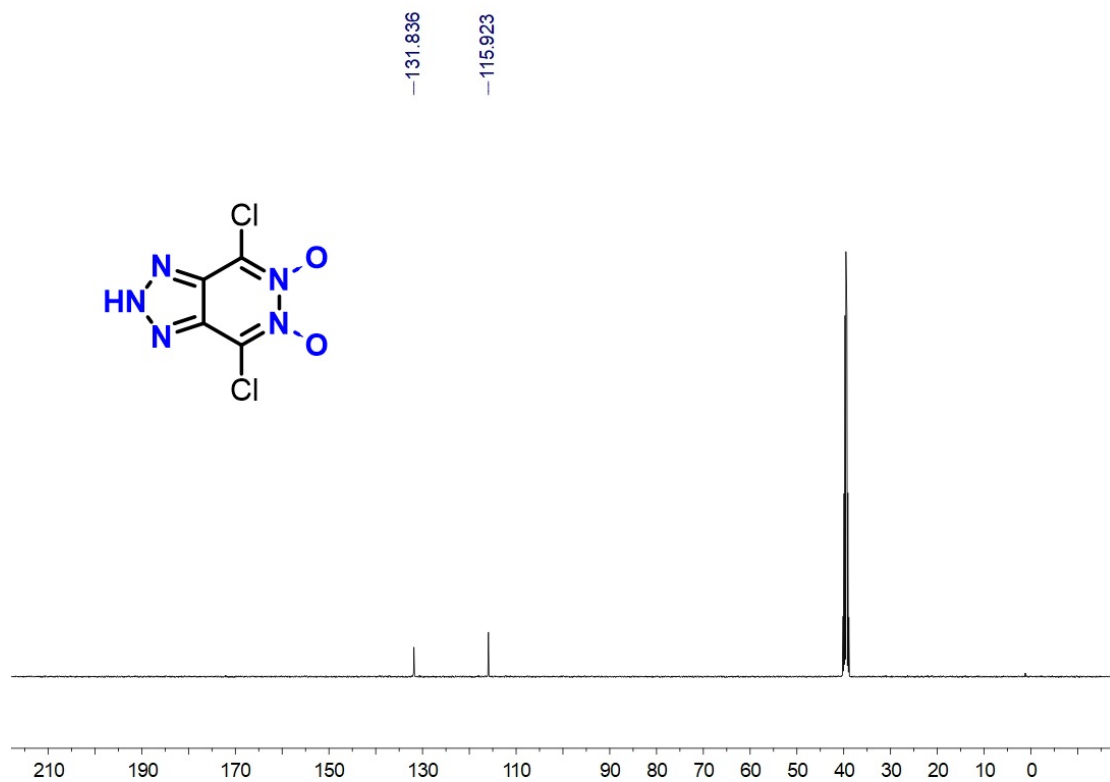

<sup>1</sup>H NMR Spectrum of **4a** (DMSO, 400 MHz)

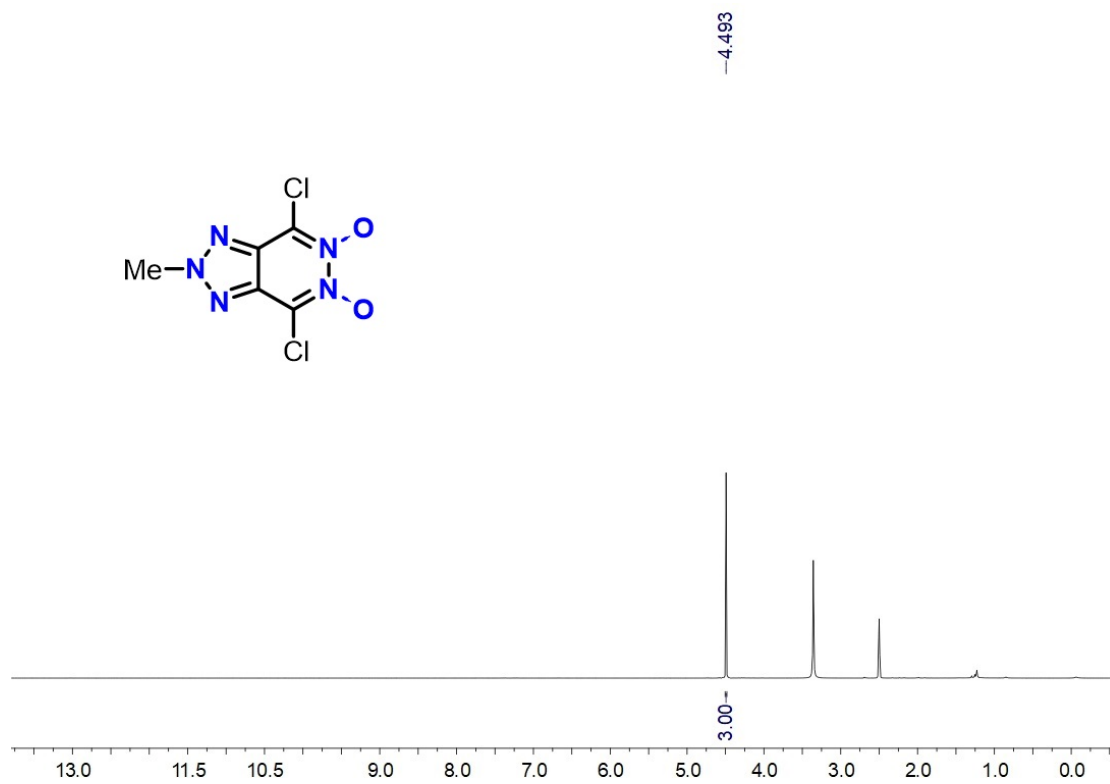

<sup>13</sup>C NMR Spectrum of **4a** (DMSO, 100 MHz)

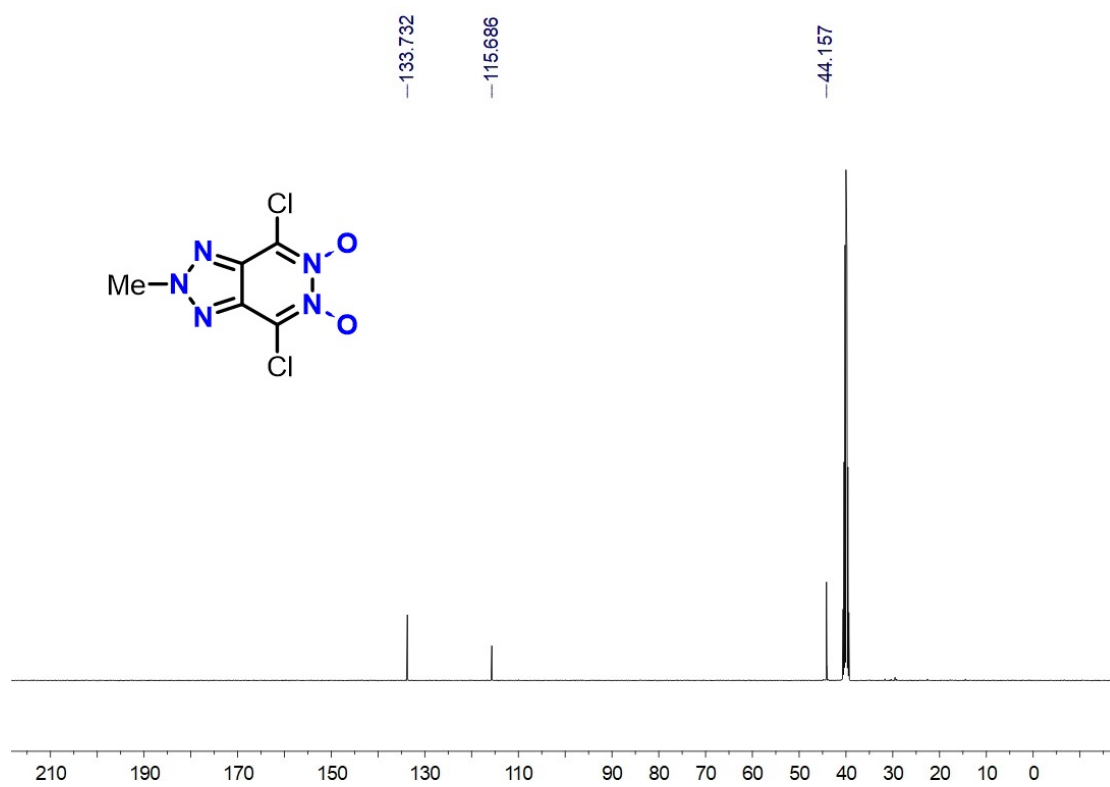

<sup>13</sup>C NMR Spectrum of **8** (CD<sub>3</sub>CN, 100 MHz)

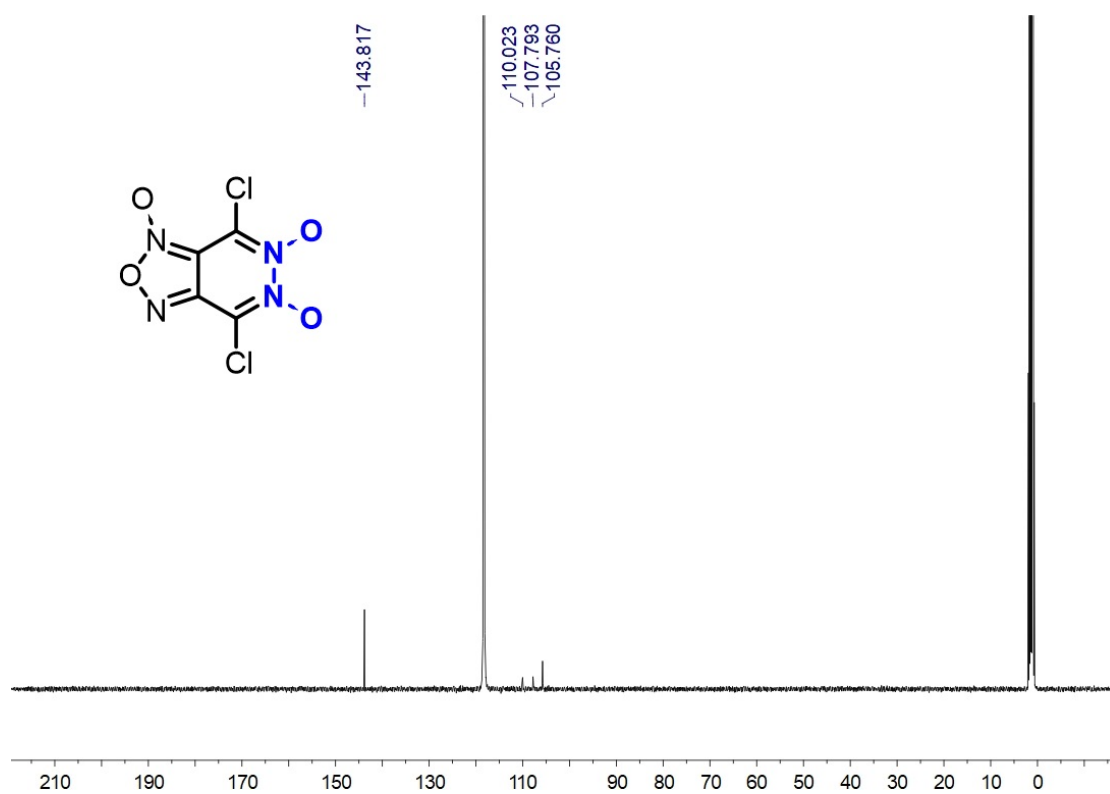

<sup>13</sup>C NMR Spectrum of **12** (CD<sub>3</sub>CN, 100 MHz)

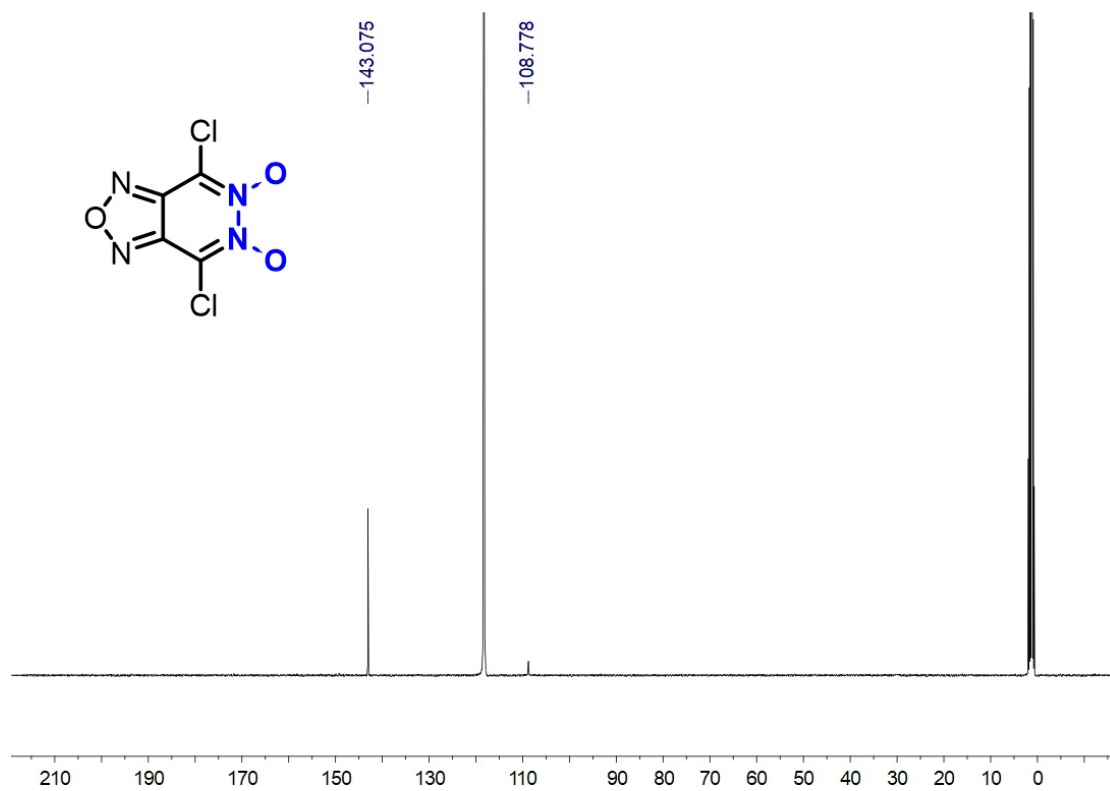

<sup>1</sup>H NMR Spectrum of **14** (DMSO, 400 MHz)

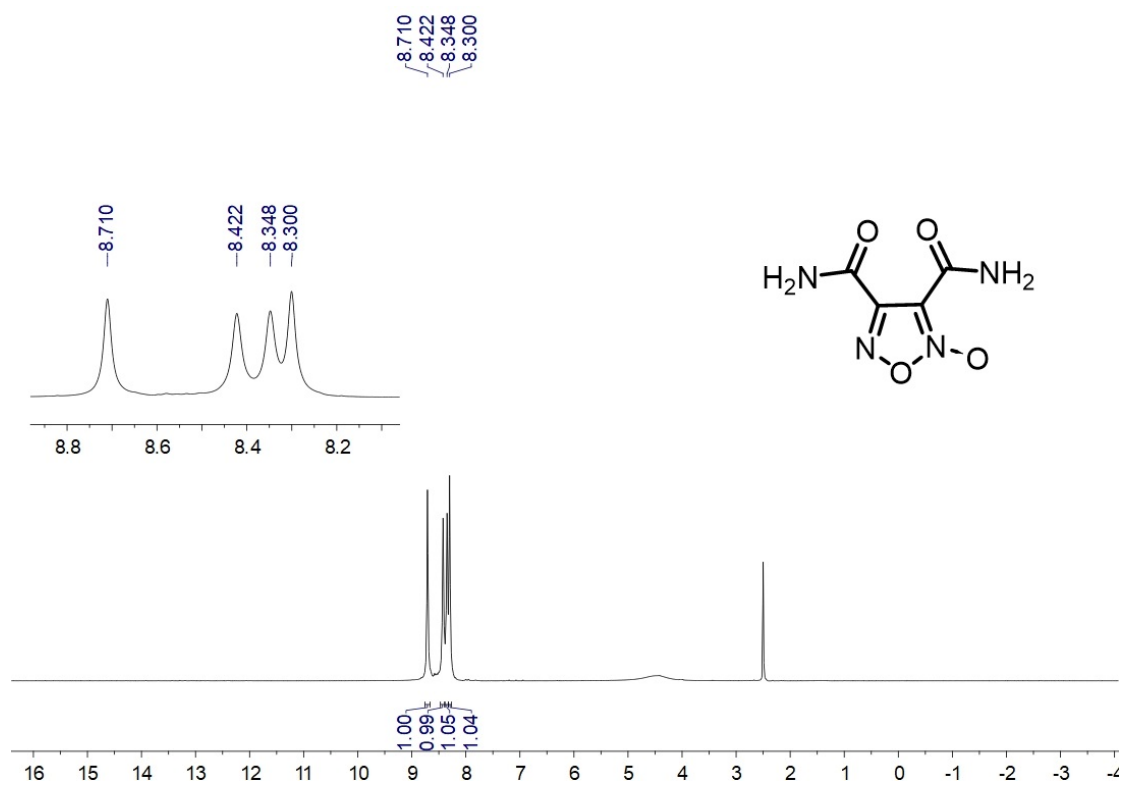

<sup>13</sup>C NMR Spectrum of **14** (DMSO, 100 MHz)

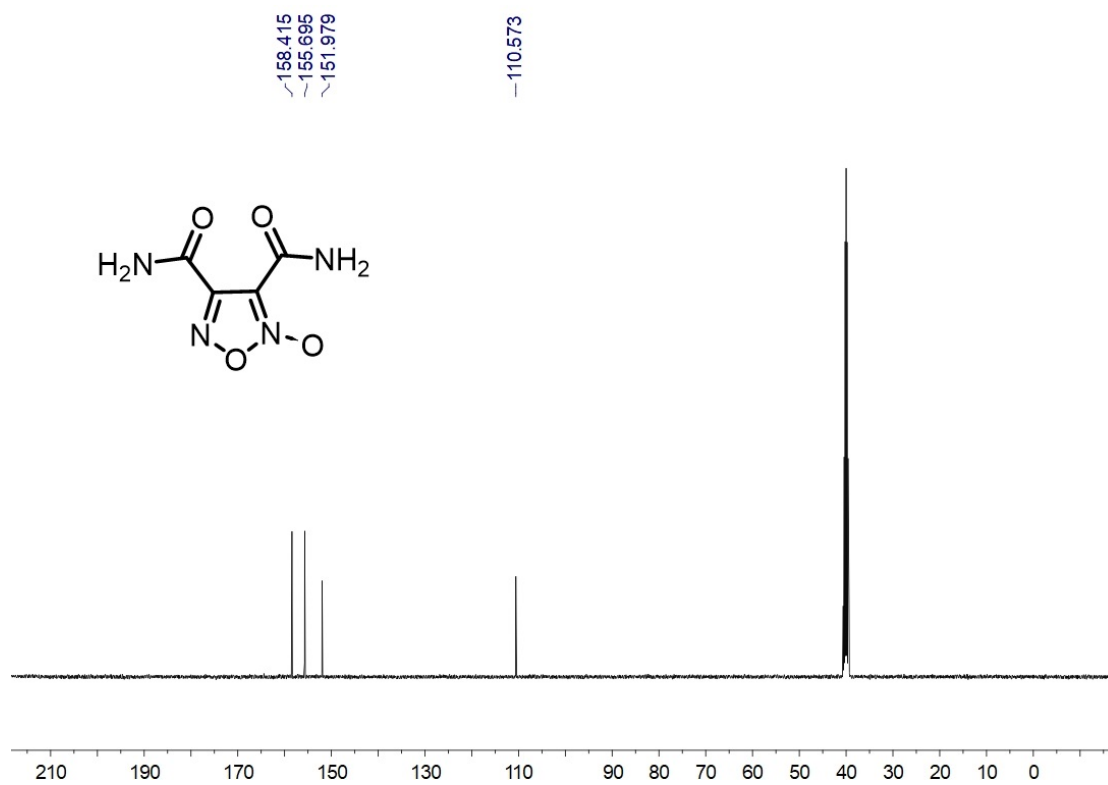



<sup>1</sup>H NMR Spectrum of **16** (Acetone-d<sub>6</sub>, 400 MHz)

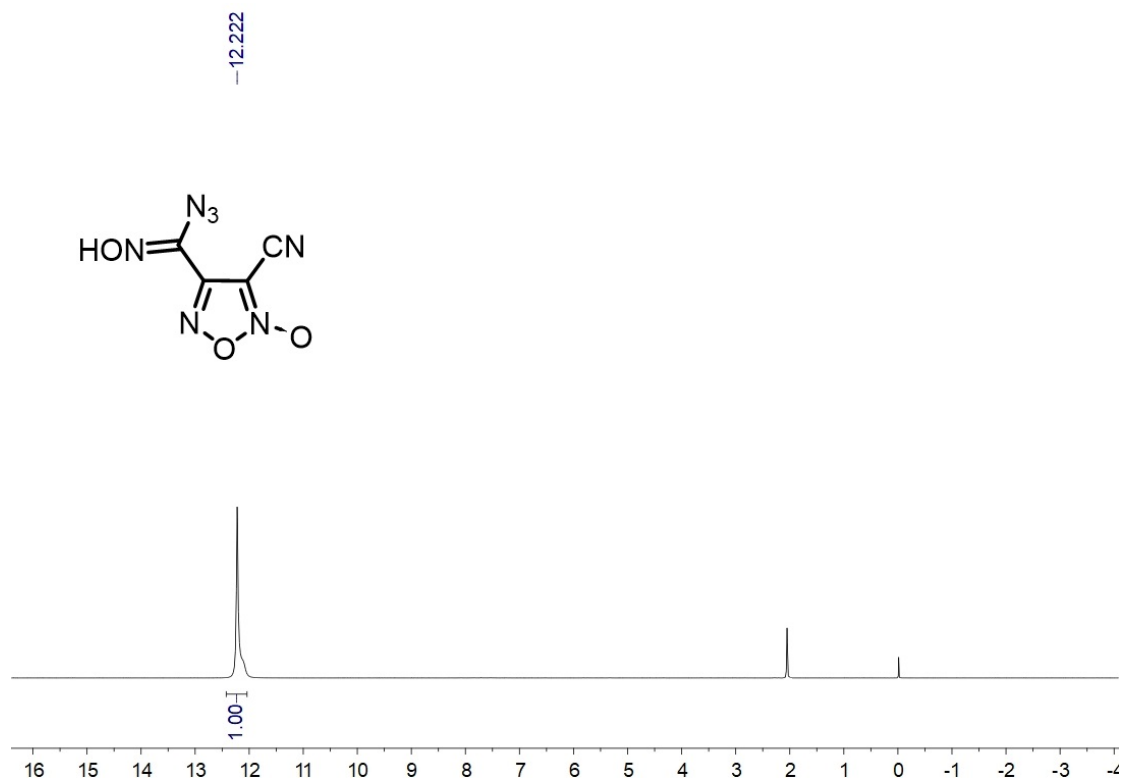

<sup>13</sup>C NMR Spectrum of **16** (Acetone-d<sub>6</sub>, 100 MHz)

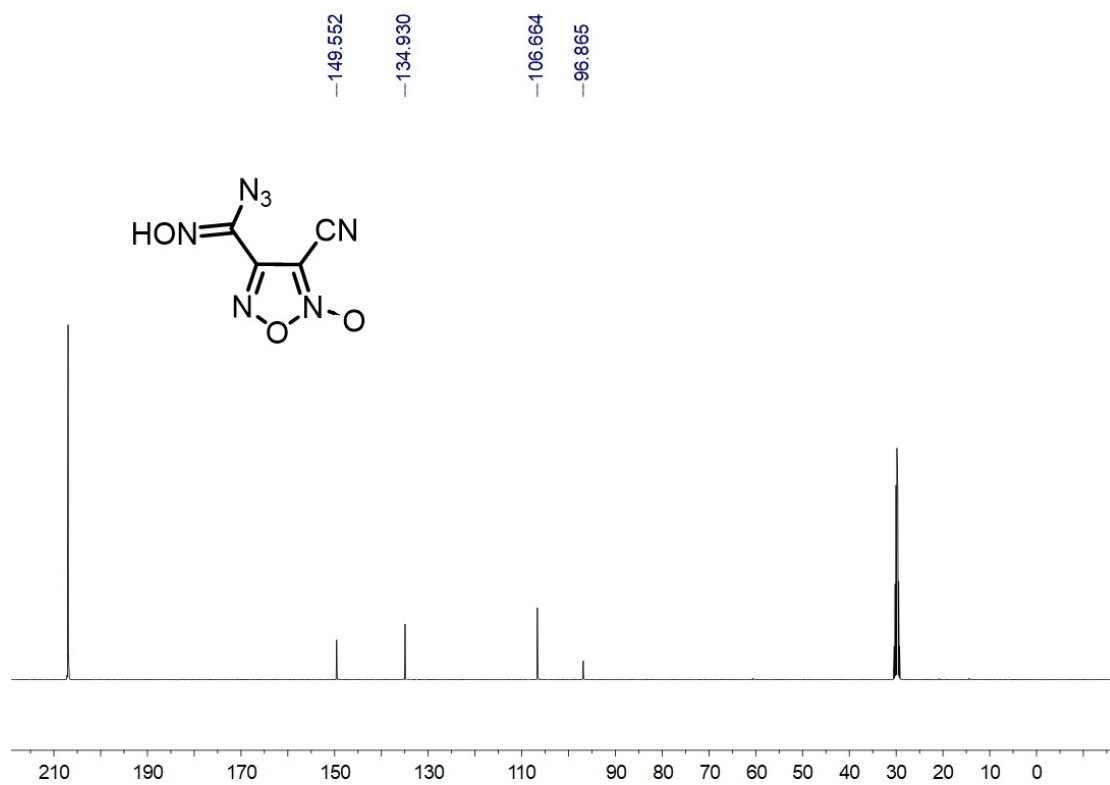

## VI. IR spectra

IR spectrum of compound **4**

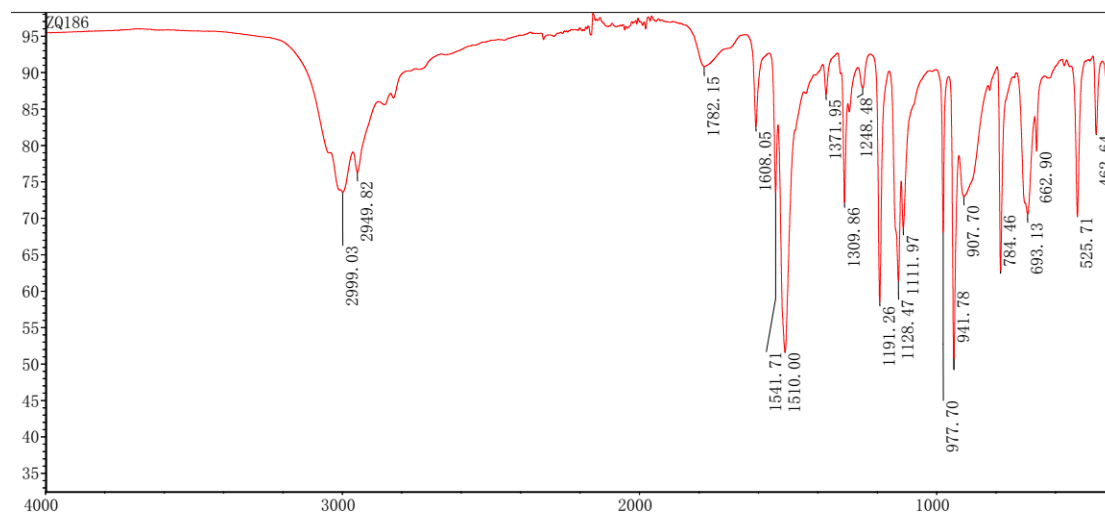

IR spectrum of compound **8**

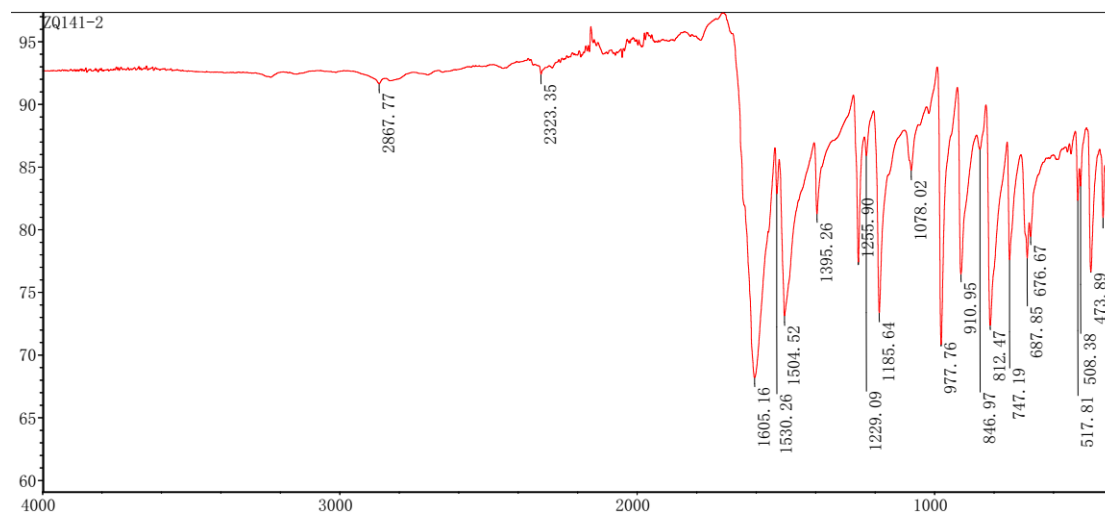

### IR spectrum of compound 12

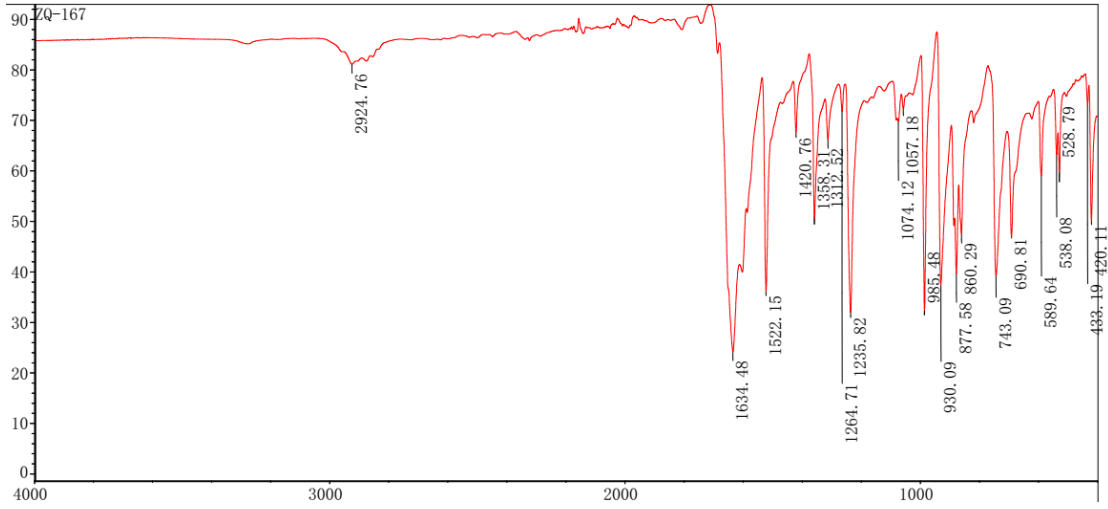

### IR spectrum of compound 16

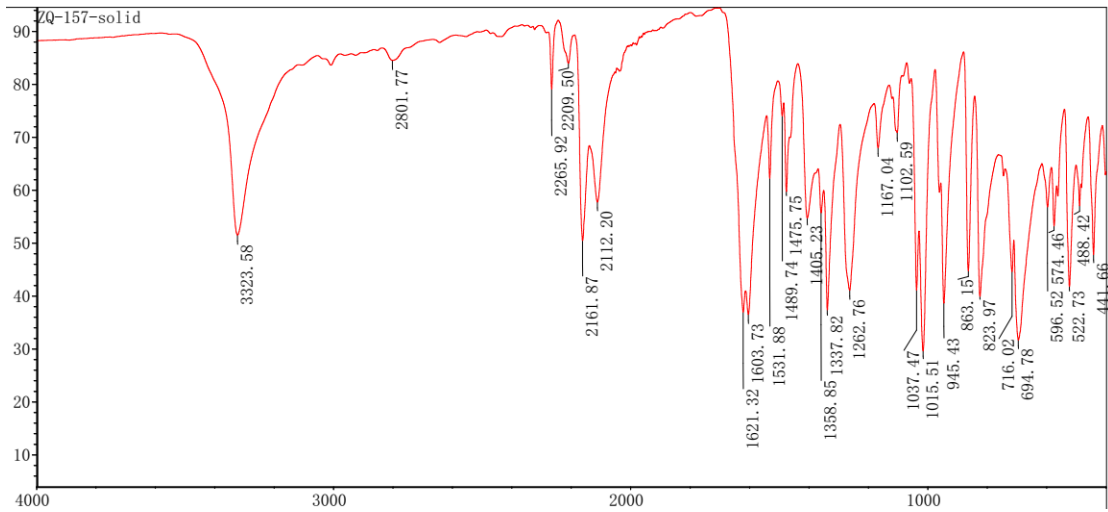

Supplement: d2nj02908a1.pdf [file d2nj02908a1.pdf]
